# Supplementary material for: Defect induced “super mop” like behaviour of Eu3+-doped hierarchical Bi2SiO5nanoparticles for improved catalytic and adsorptive behaviour
Source: Royal Society of Chemistry journal article supplement (doi:10.1039/d0ma00363h), 2020-01-01
Supplement: d0ma00363h1.pdf [file d0ma00363h1.pdf]

## Supporting Information

### **Defect induced “Super mop” like behaviour of Eu<sup>3+</sup>-doped hierarchical Bi<sub>2</sub>SiO<sub>5</sub> nanoparticles for improved catalytic and adsorptive behaviour**

Debashrita Sarkar, Sagar Ganguli, Athma E. Praveen and Venkataramanan Mahalingam\*

Department of Chemical Sciences, Indian Institute of Science Education and Research  
Kolkata, India

Email: [mvenkataramanan@yahoo.com](mailto:mvenkataramanan@yahoo.com)

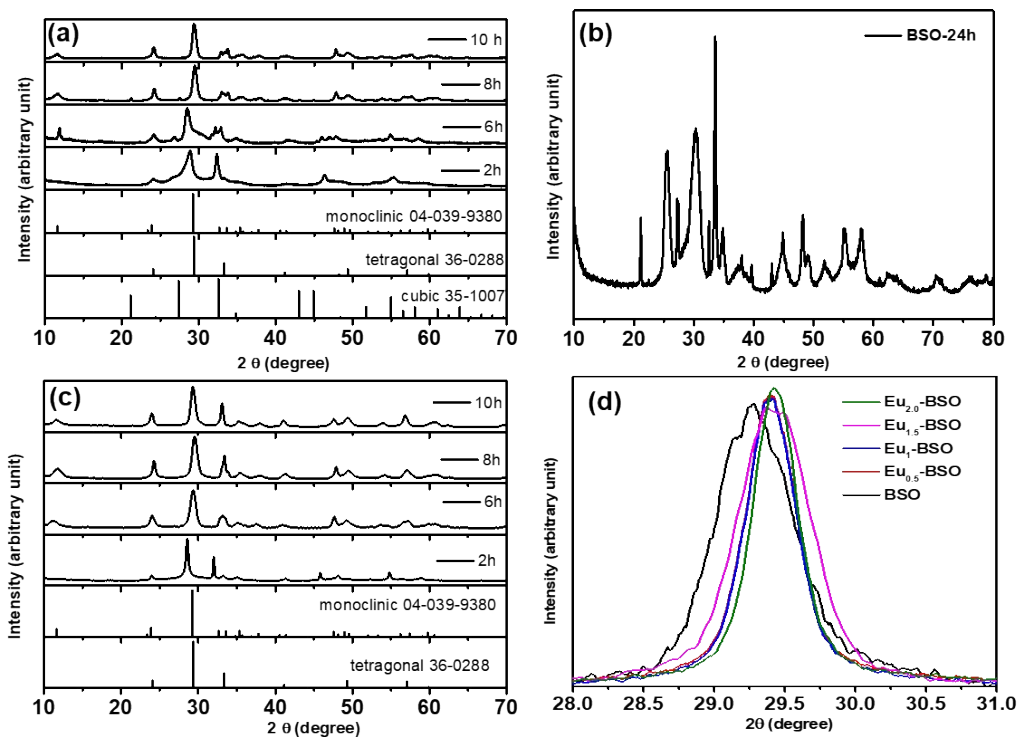

**Fig. S1:** (a) PXR D pattern for time dependent formation of  $\text{Eu}_{1.5}\text{-BSO}$  nanoparticles (b) PXR D pattern of BSO nanoparticles formed after 24h (c) PXR D pattern for time dependent formation of BSO nanoparticles and (d) Normalised intensity of (100) plane depicting shift in  $2\theta$  due to  $\text{Eu}^{3+}$  doping.

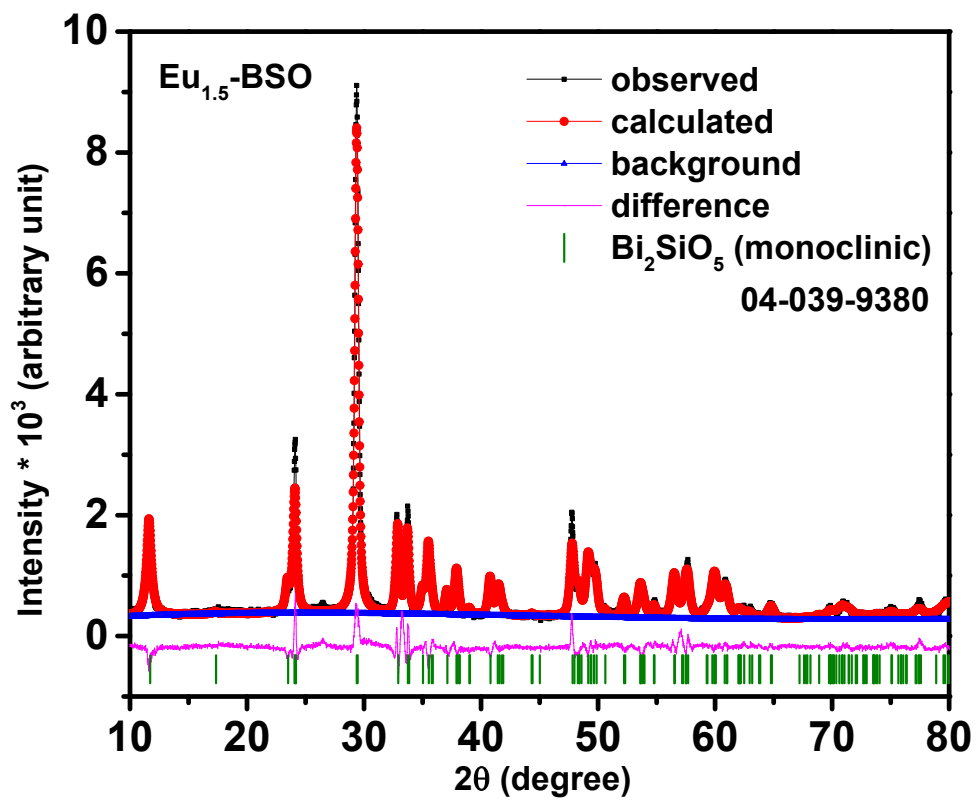

Fig. S2: Rietveld refinement of Eu<sub>1.5</sub>-BSO nanoparticles.

**Table S1:** Crystallographic data of  $(\text{Bi}_{0.985}\text{Eu}_{0.15})_2\text{SiO}_5$  determined using Reitveld refinement.

|                        |                                                                                                       |                  |                           |          |          |
|------------------------|-------------------------------------------------------------------------------------------------------|------------------|---------------------------|----------|----------|
| <b>Formula</b>         | $(\text{Bi}_{0.985}\text{Eu}_{0.15})_2\text{SiO}_5$                                                   |                  |                           |          |          |
| <b>Crystal System</b>  | Monoclinic                                                                                            |                  |                           |          |          |
| <b>Space Group</b>     | Cc                                                                                                    |                  |                           |          |          |
| <b>Cell parameters</b> | a=15.11368 Å ,b= 5.42673 Å<br>,c= 5.29606 Å<br>$\alpha = \gamma = 90^\circ$<br>$\beta = 90.224^\circ$ |                  |                           |          |          |
| <b>Cell Volume</b>     | 434.368 Å <sup>3</sup>                                                                                |                  |                           |          |          |
| <b>Density</b>         | 7.981                                                                                                 |                  |                           |          |          |
| <b>R<sub>wp</sub></b>  | 10.185%                                                                                               |                  |                           |          |          |
| <b>GOF</b>             | 2.4                                                                                                   |                  |                           |          |          |
| <b>Atom</b>            | <b>Wyckoff position</b>                                                                               | <b>Occupancy</b> | <b>Atomic coordinates</b> |          |          |
|                        |                                                                                                       |                  | <b>x</b>                  | <b>y</b> | <b>z</b> |
| <b>Bi1</b>             | 4a                                                                                                    | 0.9850           | 0.1696                    | 0.2166   | 0.2609   |
| <b>Bi2</b>             | 4a                                                                                                    | 1                | 0.8399                    | 0.2195   | 0.274    |
| <b>Si</b>              | 4a                                                                                                    | 1                | 0.5057                    | 0.172    | 0.2459   |
| <b>O1</b>              | 4a                                                                                                    | 1                | 0.499                     | 0.0166   | 0.5112   |
| <b>O2</b>              | 4a                                                                                                    | 1                | 0.5858                    | 0.3309   | 0.2247   |
| <b>O3</b>              | 4a                                                                                                    | 1                | 0.4039                    | 0.3233   | 0.2268   |
| <b>O4</b>              | 4a                                                                                                    | 0.795            | 0.2497                    | 0.4942   | 0.4949   |
| <b>O5</b>              | 4a                                                                                                    | 1                | 0.2563                    | 0.2563   | 0.2563   |
| <b>Eu</b>              | 4a                                                                                                    | 0.015            | 0.1696                    | 0.2166   | 0.2609   |

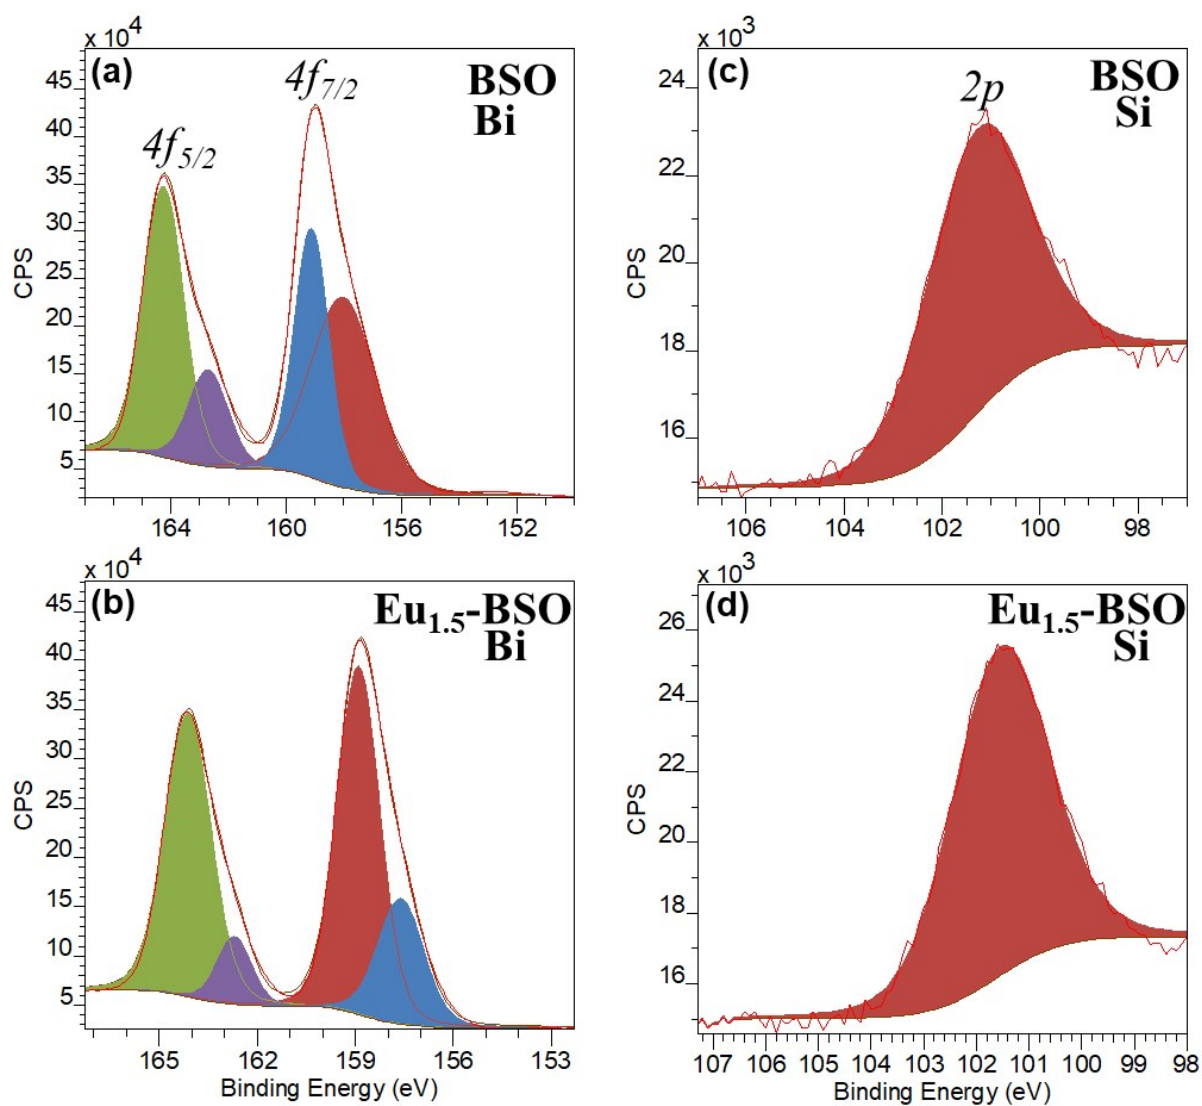

**Fig. S3:** XPS spectra of (a) Bi 4f for BSO, (b) Bi 4f for Eu<sub>1.5</sub>-BSO, (c) Si 2p for BSO, and (d) Si 2p for Eu<sub>1.5</sub>-BSO nanoparticles.

**Table S2:** Bond vibration of the different bonds obtained using Fourier Transformed Infrared spectroscopy.

|                             | O-H<br>(cm <sup>-1</sup> ) | Si-O-Si<br>Symmetric<br>(cm <sup>-1</sup> ) | Si-O-Si<br>Asymmetric<br>(cm <sup>-1</sup> ) | SiO <sub>4</sub><br>Distorted<br>(cm <sup>-1</sup> ) | Si-O-Bi<br>(cm <sup>-1</sup> ) | Bi-O-Bi<br>(cm <sup>-1</sup> ) |
|-----------------------------|----------------------------|---------------------------------------------|----------------------------------------------|------------------------------------------------------|--------------------------------|--------------------------------|
| <b>BSO</b>                  | 3394                       | 1380                                        | 1047                                         | 952                                                  | 897,857                        | 611                            |
| <b>Eu<sub>0.5</sub>-BSO</b> | 3429                       | 1385                                        | 1044                                         | 950                                                  | 858                            | 574                            |
| <b>Eu<sub>1.0</sub>-BSO</b> | 3452                       | 1424                                        | 1048                                         | 946                                                  | 859                            | 575                            |
| <b>Eu<sub>1.5</sub>-BSO</b> | 3429                       | 1473                                        | 1048                                         | 946                                                  | 860                            | 574                            |
| <b>Eu<sub>2.0</sub>-BSO</b> | 3420                       | 1454                                        | 1046                                         | 946                                                  | 858                            | 575                            |

**Table S3:** ICP- Analysis of Eu<sub>1.5</sub>-BSO nanoparticles

| Sample Information | Bismuth (Atomic Mass=208.9804) |        |        | Europium (Atomic Mass=151.964) |       |        |
|--------------------|--------------------------------|--------|--------|--------------------------------|-------|--------|
|                    | ppm                            | mg/L   | mmol/L | ppm                            | mg/L  | mmol/L |
| <b>Eu-BSO</b>      | 46.404                         | 46.404 | 0.222  | 0.491                          | 0.491 | 0.003  |

**Table S4:** Elemental composition obtained using EDS for BSO and Eu-BSO nanoparticles

| Sample                      | O     | Si   | Eu   | Bi    |
|-----------------------------|-------|------|------|-------|
| <b>BSO</b>                  | 68.9  | 9.33 |      | 21.69 |
| <b>Eu<sub>0.5</sub>-BSO</b> | 74.13 | 7.82 | 0.11 | 17.42 |
| <b>Eu<sub>1.0</sub>-BSO</b> | 76.7  | 7.14 | 0.21 | 15.95 |
| <b>Eu<sub>1.5</sub>-BSO</b> | 71.91 | 8.82 | 0.33 | 18.94 |
| <b>Eu<sub>2.0</sub>-BSO</b> | 73.20 | 7.93 | 0.34 | 18.52 |

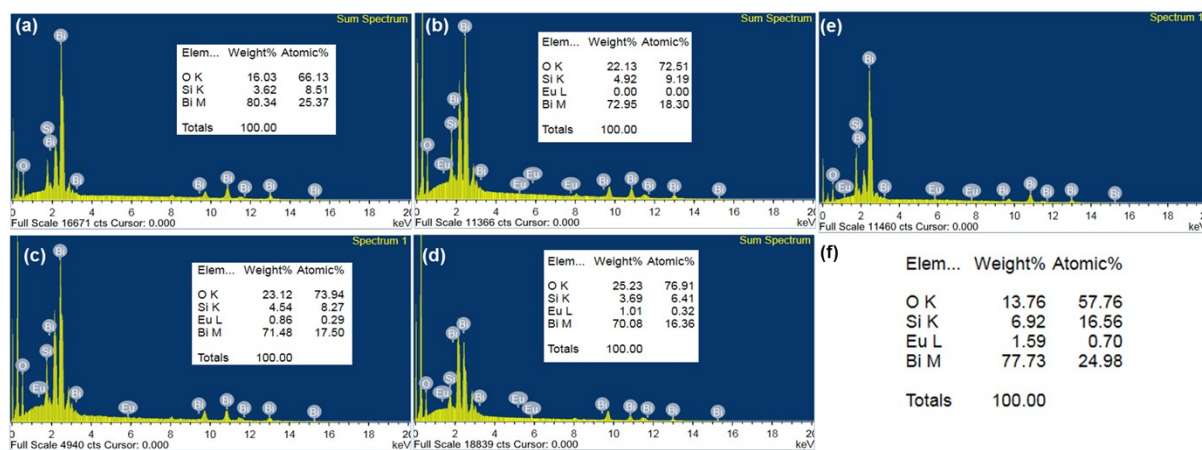

**Fig. S4:** EDS spectra for (a) BSO (b) Eu<sub>0.5</sub>-BSO (c) Eu<sub>1</sub>-BSO (d) Eu<sub>1.5</sub>-BSO (inset shows the elemental composition) (e) Eu<sub>2</sub>-BSO (f) elemental composition of Eu<sub>2</sub>-BSO nanoparticles.

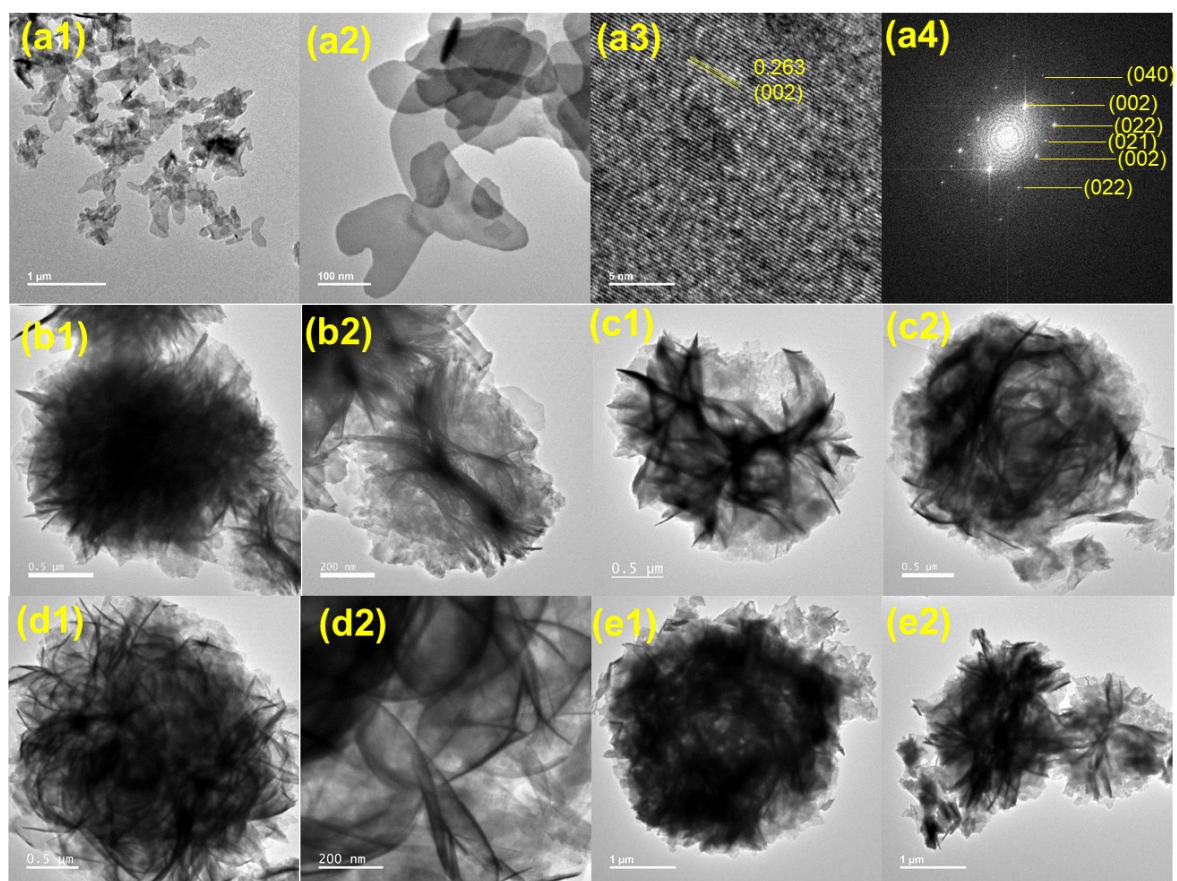

**Fig. S5:** TEM image of (a1-a2) BSO (a3) HRTEM image depicting interplaner distance corresponding to (002) plane (a4) FFT image depicting various planes for BSO (b1-b2)  $\text{Eu}_{0.5}$ -BSO nanoparticles (c1-c2)  $\text{Eu}_1$ -BSO nanoparticles (d1-d2)  $\text{Eu}_{1.5}$ -BSO nanoparticles (e1-e2)  $\text{Eu}_2$ -BSO nanoparticles.



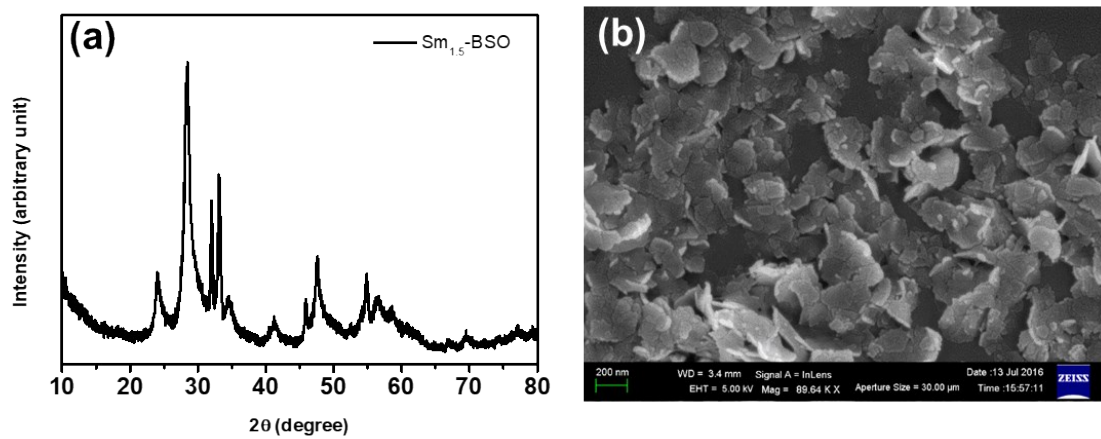

**Fig. S6:** (a) PXRD pattern of Sm<sub>1.5</sub>-BSO nanoparticles depicting monoclinic phase (b) FESEM image of Sm<sub>1.5</sub>-BSO nanoparticles.

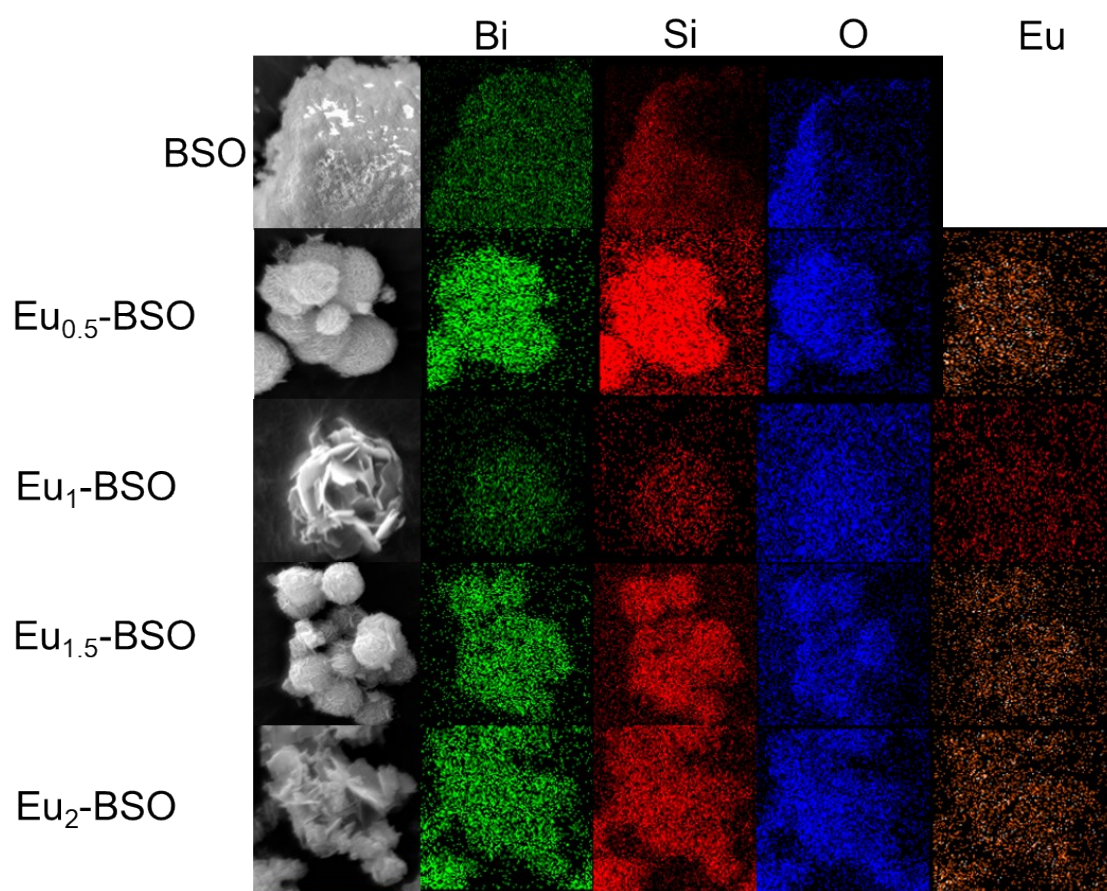

**Fig. S7:** Elemental mapping of BSO nanoparticles and Eu-BSO nanoparticles depicting the presence of Bi, Si, O, and Eu.

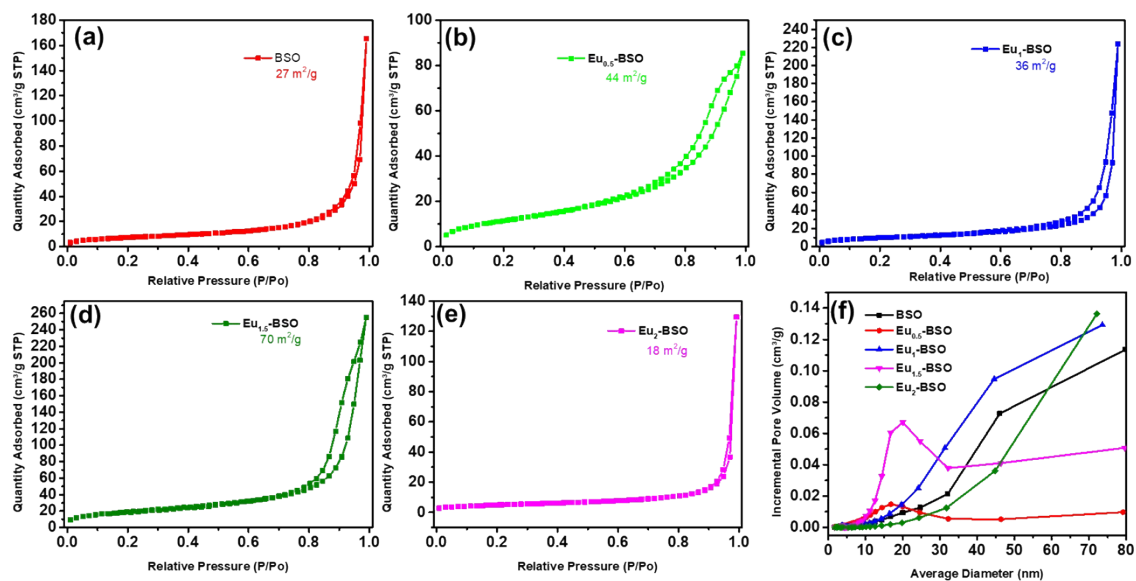

**Fig. S8** : Nitrogen adsorption desorption isotherm of (a) BSO (b)  $\text{Eu}_{0.5}$ -BSO (c)  $\text{Eu}_{1.0}$ -BSO (d)  $\text{Eu}_{1.5}$ -BSO (e)  $\text{Eu}_{2.0}$ -BSO (f) BJH pore size distribution of BSO and Eu-BSO nanoparticles.

**Table S5**: Comparison of BET surface area, pore volume and pore size distribution of BSO and Eu-BSO nanoparticles.

| Material information                    | BET Surface area ( $\text{m}^2/\text{g}$ ) | Pore volume ( $\text{cm}^3/\text{g}$ ) | Average pore diameter (nm) |
|-----------------------------------------|--------------------------------------------|----------------------------------------|----------------------------|
| <b>BSO</b>                              | $27.1010 \pm 0.0726$                       | 0.077821                               | 2.22743                    |
| <b><math>\text{Eu}_{0.5}</math>-BSO</b> | $43.6855 \pm 0.1466$                       | 0.105733                               | 16.81833                   |
| <b><math>\text{Eu}_{1.0}</math>-BSO</b> | $35.6200 \pm 0.1521$                       | 0.087918                               | 3.62949                    |
| <b><math>\text{Eu}_{1.5}</math>-BSO</b> | $70.1923 \pm 0.2736$                       | 0.234135                               | 20.0214                    |
| <b><math>\text{Eu}_{2.0}</math>-BSO</b> | $17.5451 \pm 0.0768$                       | 0.036943                               | 20.0214                    |

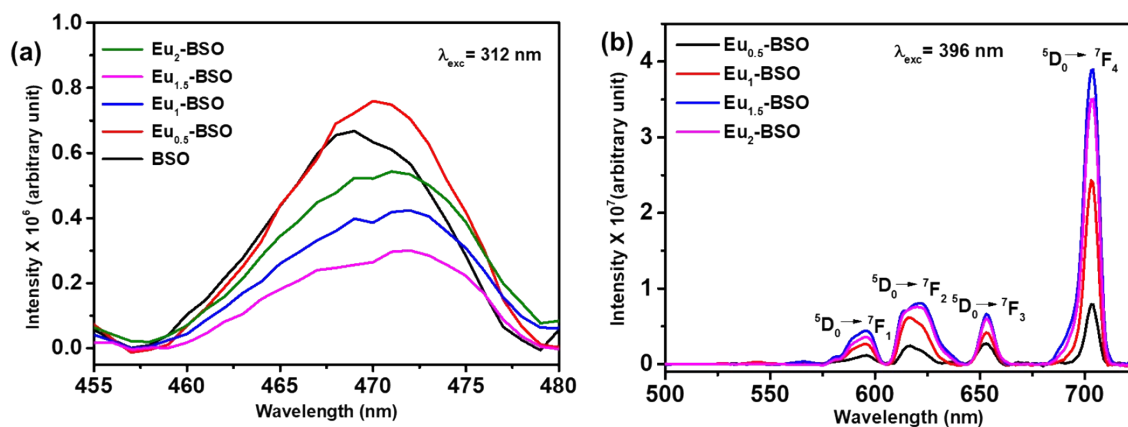

**Fig. S9:** (a) Photoluminescence of various Eu-BSO nanoparticles upon 312 nm excitation and (b) Photoluminescence of  $\text{Eu}^{3+}$  incorporated in various Eu-BSO nanoparticles upon 396 nm excitation.

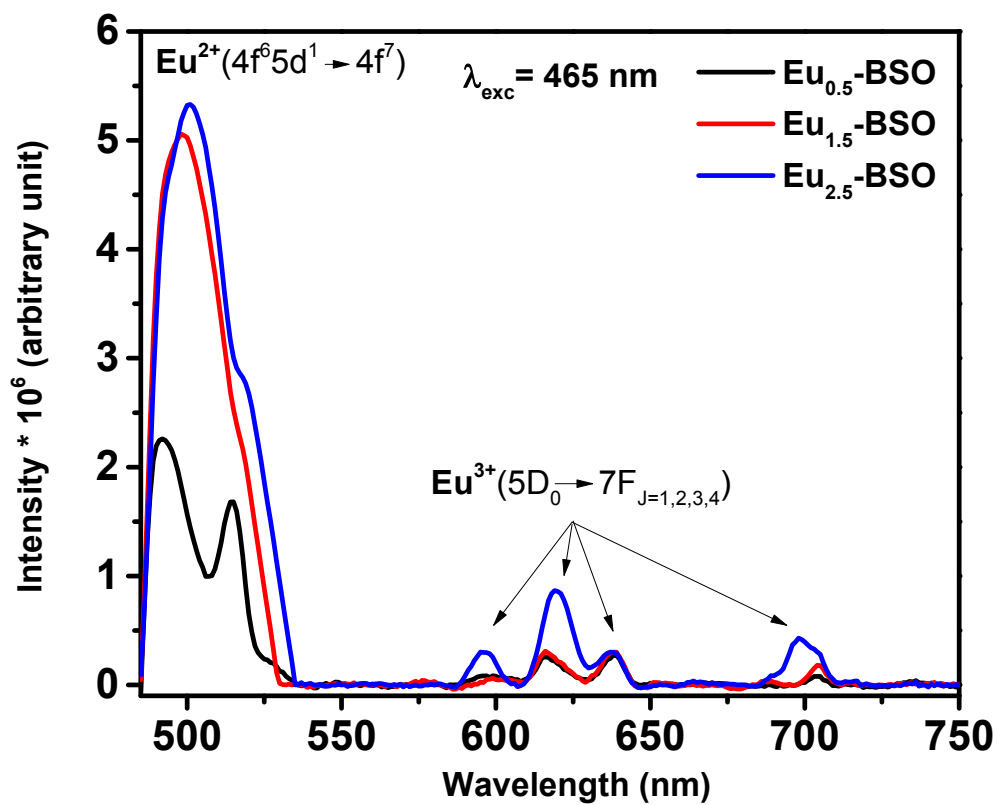

Fig. S10: Photoluminescence of various Eu-BSO nanoparticles upon 465 nm excitation.

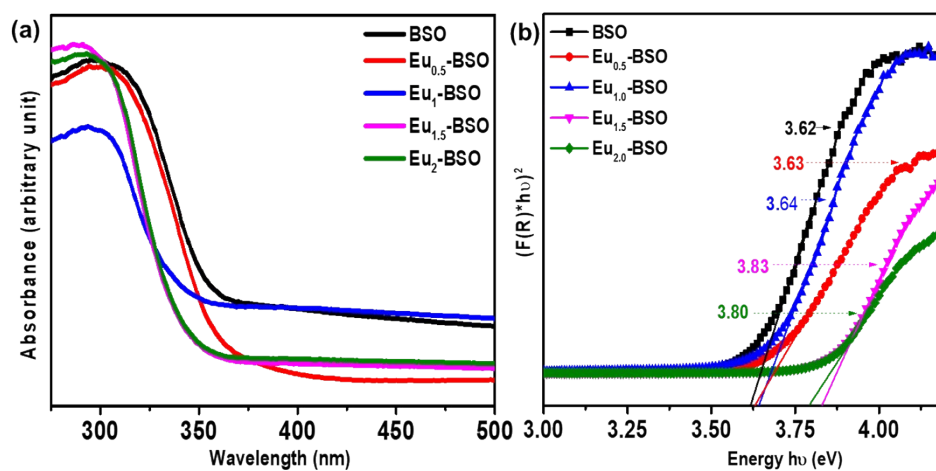

**Fig. S11:** (a) Absorption spectra of BSO nanoparticle and Eu-doped BSO nanoparticles (b) Kubelka-Munk plot for BSO and Eu-BSO nanoparticles.

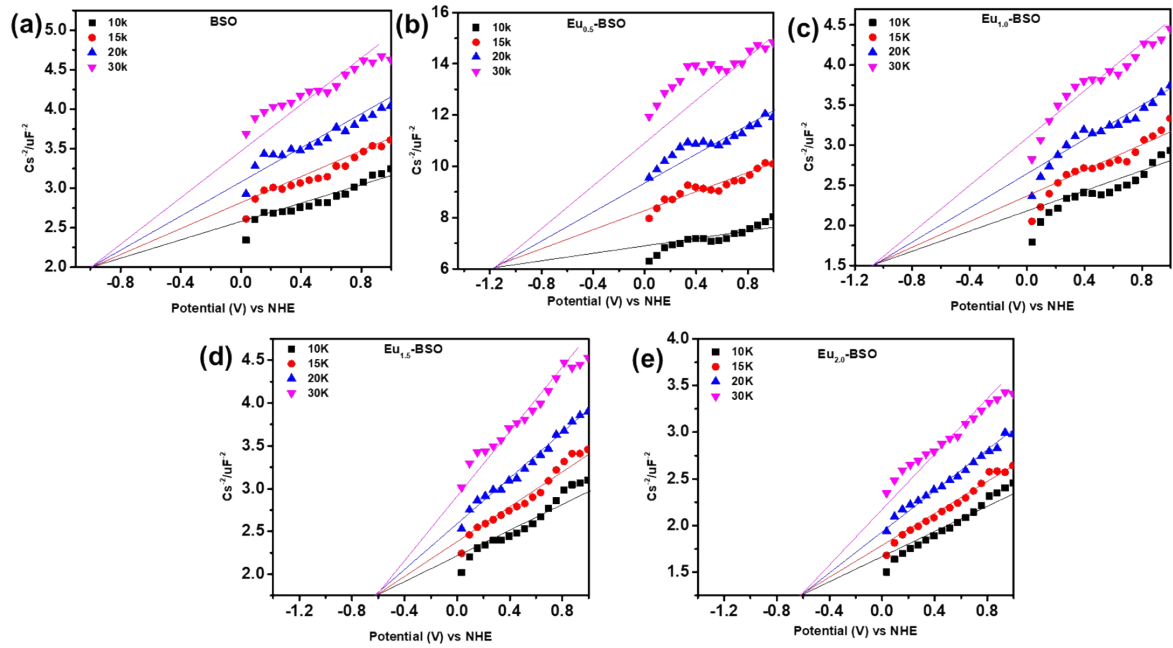

**Fig. S12:** Mott Schottky plot of (a) BSO (b)  $Eu_{0.5}$ -BSO (c)  $Eu_{1.0}$ -BSO (d)  $Eu_{1.5}$ -BSO (e)  $Eu_{2.0}$ -BSO.

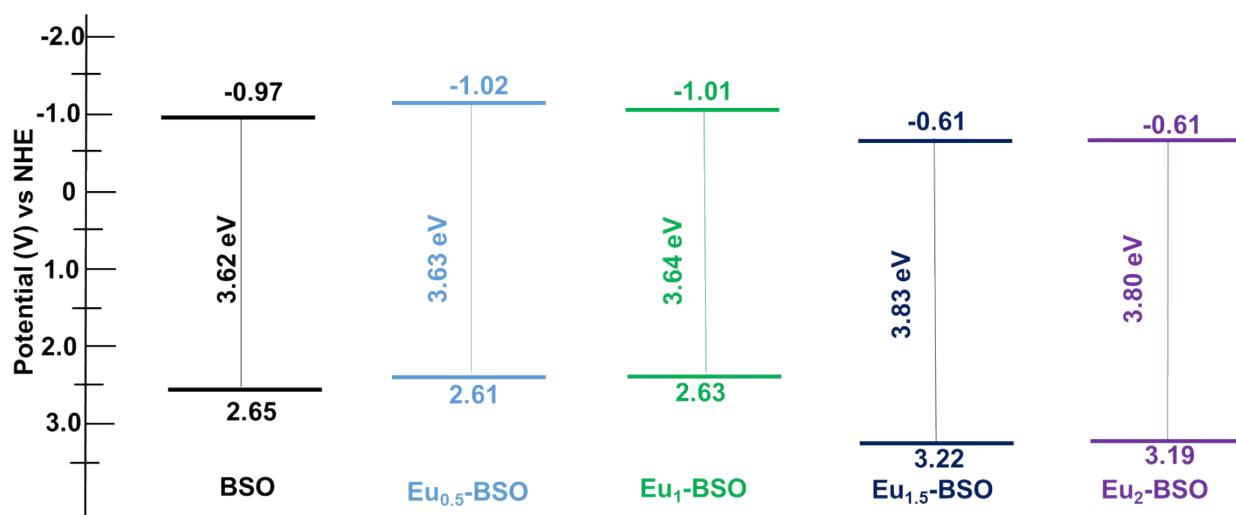

**Fig. S13:** Band edge potential of different Eu-BSO nanoparticles.

**Table S6:** Band edge potential of various Eu-doped BSO

| Material Information        | CB(scan 1) (eV) | CB(scan 1) (eV) | CB(scan 1) (eV) | CB (Avg. + SD) (eV) | Band gap $E_g$ (eV) | VB (eV)          |
|-----------------------------|-----------------|-----------------|-----------------|---------------------|---------------------|------------------|
| <b>BSO</b>                  | 1.0             | -0.98           | -0.94           | $-0.97 \pm 0.02$    | 3.62                | $2.65 \pm 0.02$  |
| <b>Eu<sub>0.5</sub>-BSO</b> | -1.16           | -0.97           | -0.94           | $-1.02 \pm 0.09$    | 3.63                | $2.61 \pm 0.09$  |
| <b>Eu<sub>1.0</sub>-BSO</b> | -1.07           | -1.009          | -0.96           | $-1.01 \pm 0.04$    | 3.64                | $2.63 \pm 0.04$  |
| <b>Eu<sub>1.5</sub>-BSO</b> | -0.63           | -0.61           | -0.58           | $-0.61 \pm 0.02$    | 3.83                | $3.22 \pm 0.02$  |
| <b>Eu<sub>2.0</sub>-BSO</b> | -0.61           | -0.608          | -0.607          | $-0.61 \pm 0.001$   | 3.80                | $3.19 \pm 0.001$ |



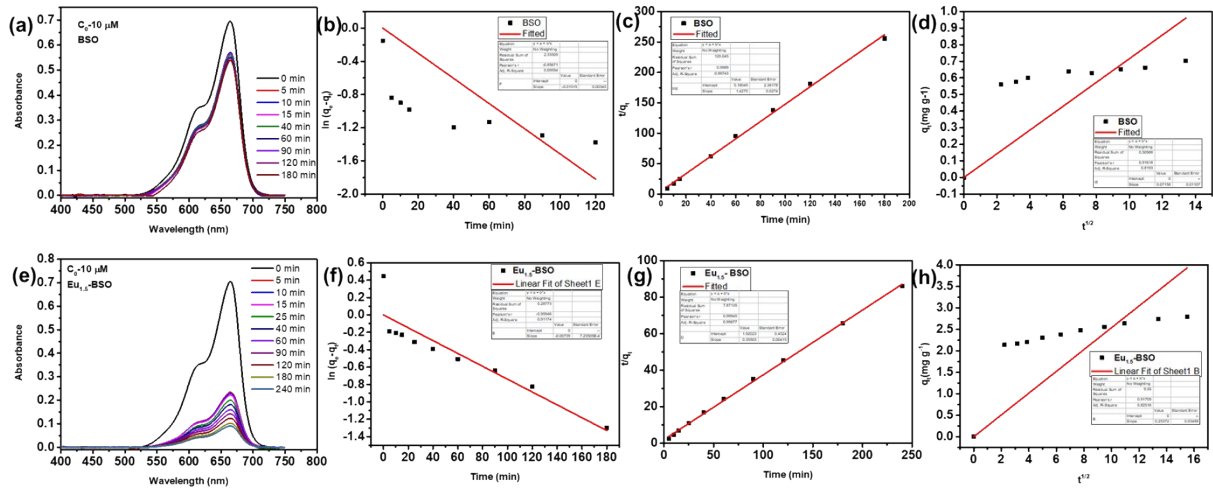

**Fig. S14:** (a) Absorption spectra for adsorption of MB dye using BSO nanoparticles (b) Fit of kinetic data to pseudo first order model for BSO nanoparticles (c) Fit of kinetic data to pseudo second order model for BSO nanoparticles (d) Fit of kinetic data to intraparticle diffusion model for BSO nanoparticles (e) Absorption spectra for adsorption of MB dye using Eu<sub>1.5</sub>-BSO nanoparticles (f) Fit of kinetic data to pseudo first order model for Eu<sub>1.5</sub>-BSO nanoparticles (g) Fit of kinetic data to pseudo second order model for Eu<sub>1.5</sub>-BSO nanoparticles (h) Fit of kinetic data to intraparticle diffusion model for Eu<sub>1.5</sub>-BSO nanoparticles.

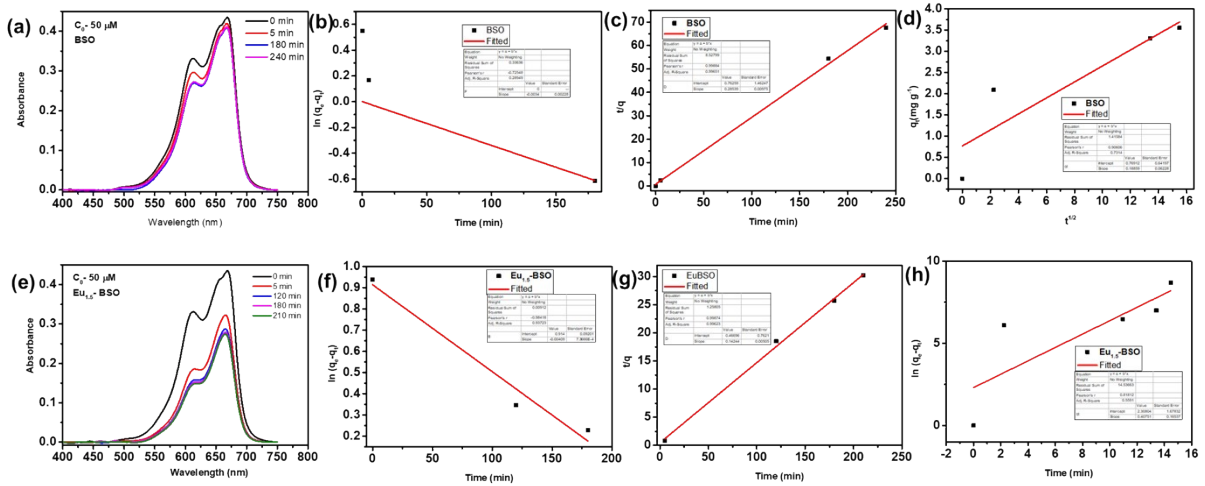

**Fig. S15:** (a) Absorption spectra for adsorption of MB dye using BSO nanoparticles (b) Fit of kinetic data to pseudo first order model for BSO nanoparticles (c) Fit of kinetic data to pseudo second order model for BSO nanoparticles (d) Fit of kinetic data to intraparticle diffusion model for BSO nanoparticles (e) Absorption spectra for adsorption of MB dye using Eu<sub>1.5</sub>-BSO nanoparticles (f) Fit of kinetic data to pseudo first order model for Eu<sub>1.5</sub>-BSO nanoparticles (g) Fit of kinetic data to pseudo second order model for Eu<sub>1.5</sub>-BSO nanoparticles (h) Fit of kinetic data to intraparticle diffusion model for Eu<sub>1.5</sub>-BSO nanoparticles.

**Table S7:** Kinetics parameters for BSO and Eu<sub>1.5</sub>-BSO nanoparticles for adsorption of methylene blue dye for different initial concentration of dye

|                               | $q_{e,exp}$ (mg g <sup>-1</sup> ) | Pseudo first order          |                            |                | Pseudo second order         |                                               |                |                                                       | IPD     |                |
|-------------------------------|-----------------------------------|-----------------------------|----------------------------|----------------|-----------------------------|-----------------------------------------------|----------------|-------------------------------------------------------|---------|----------------|
|                               |                                   | $q_e$ (mg g <sup>-1</sup> ) | $k_1$ (min <sup>-1</sup> ) | R <sup>2</sup> | $q_e$ (mg g <sup>-1</sup> ) | $k_2$ (g mg <sup>-1</sup> min <sup>-1</sup> ) | R <sup>2</sup> | $h$ (k <sub>2</sub> q <sub>e,exp</sub> <sup>2</sup> ) | $k_1$   | R <sup>2</sup> |
| BSO (10μM)                    | 0.704                             | 1                           | 3.5x10 <sup>-2</sup>       | 0.69594        | 0.70052                     | 39.3x10 <sup>-2</sup>                         | 0.99743        | 0.2047                                                | 0.07518 | 0.8193         |
| Eu <sub>1.5</sub> -BSO (10μM) | 2.784                             | 1                           | 1.7x10 <sup>-2</sup>       | 0.91174        | 0.81763                     | 6.5x10 <sup>-2</sup>                          | 0.99877        | 0.5038                                                | 0.25730 | 0.82516        |
| BSO (50μM)                    | 3.552                             | 1                           | 0.0078                     | 0.289          | 3.49772                     | 10.7x10 <sup>-2</sup>                         | 0.99651        | 1.3499                                                | 0.1886  | 0.7314         |
| Eu <sub>1.5</sub> -BSO (50μM) | 8.7                               | 8.2032                      | 0.00941                    | 0.93723        | 7.02049                     | 4.3x10 <sup>-2</sup>                          | 0.99623        | 3.2546                                                | 0.4075  | 0.5591         |

**Table S8:** Comparison table for adsorption of pollutants by various reported materials

| Adsorbent                                             | Adsorbate                        | $q_e$ (mg g <sup>-1</sup> ) | Kinetics (k <sub>1</sub> /k <sub>2</sub> /k <sub>p</sub> ) | Reference        |
|-------------------------------------------------------|----------------------------------|-----------------------------|------------------------------------------------------------|------------------|
| Eu <sub>1.5</sub> -BSO<br>BSO                         | Methylene blue<br>Methylene blue | 8.7<br>3.5                  | 6.5 *10 <sup>-2</sup><br>39.3 *10 <sup>-2</sup>            | <b>This work</b> |
| Magnesium Silicate/Reduced Graphene Oxide             | Methylene blue                   | 101                         | 3.3 *10 <sup>-3</sup>                                      | 1                |
| magnetic graphene oxide                               | Methylene blue                   | 256.4                       | 5.0 *10 <sup>-4</sup>                                      | 2                |
| Magnesium silicate                                    | Methylene blue                   | 49.8                        | 1.1 *10 <sup>-2</sup>                                      | 3                |
| Sewage sludge based granular activated carbon (SSGAC) | Methylene blue                   | 27.68                       | 1.6 *10 <sup>-2</sup>                                      | 4                |
| Moroccan clay                                         | Methylene blue                   | 172.8                       | 5.0 *10 <sup>-3</sup>                                      | 5                |
| manganese nodule                                      | Methylene blue                   | 51.28                       | 1.9 *10 <sup>-2</sup>                                      | 6                |
| Polymer networks                                      | Methylene blue                   | #                           | 2.9 × 10 <sup>-3</sup>                                     | 7                |
| Cellulose                                             | Methylene blue                   | 108.11                      | 1.3 × 10 <sup>-5</sup>                                     | 8                |
| supramolecular hydrogel                               | Methylene blue                   | #                           | 0.9 *10 <sup>-4</sup>                                      | 9                |

#  $q_e$  not calculated in the paper.

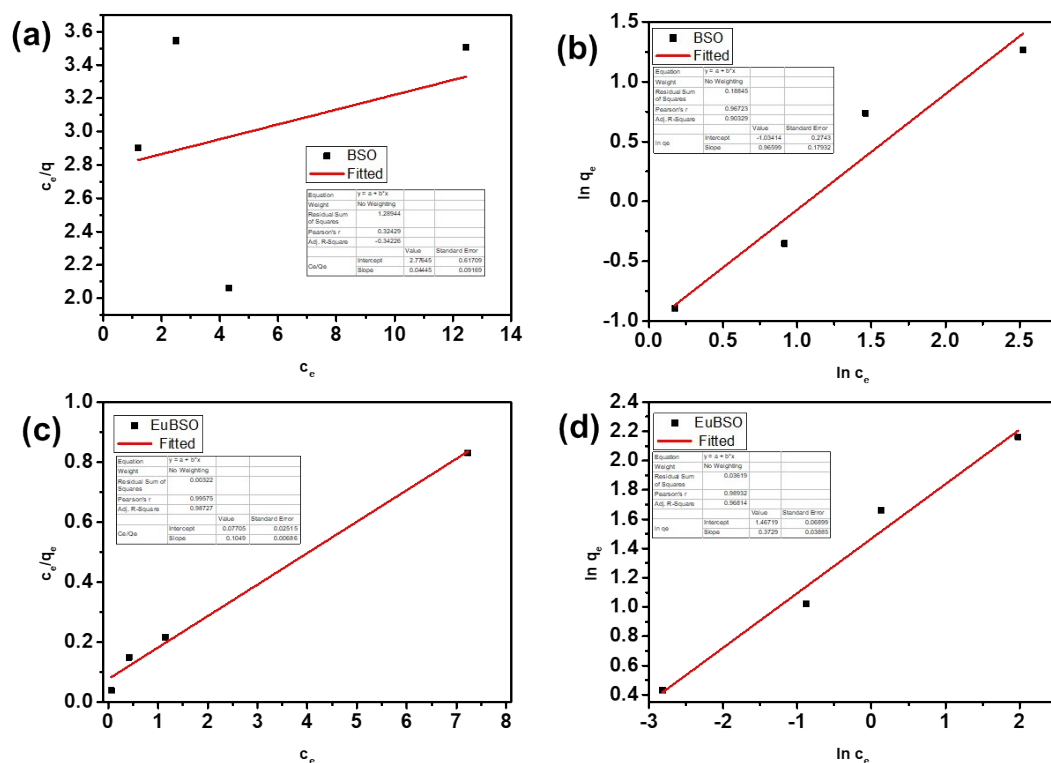

**Fig. S16:** (a) Langmuir isotherm model fitting for BSO (b) Freundlich isotherm model fitting for BSO nanoparticle (c) Langmuir isotherm model fitting for Eu<sub>1.5</sub>-BSO (b) Freundlich isotherm model fitting for Eu<sub>1.5</sub>-BSO nanoparticle.

**Table S9:** Comparison table for adsorption isotherm model of methylene blue for BSO and Eu<sub>1.5</sub>-BSO nanoparticle.

|                        | experimental $q_{max}$ (mg g <sup>-1</sup> ) | Freundlich |         |                | Langmuir                    |                         |                |
|------------------------|----------------------------------------------|------------|---------|----------------|-----------------------------|-------------------------|----------------|
|                        |                                              | $k_F$      | 1/n     | R <sup>2</sup> | $q_m$ (mg g <sup>-1</sup> ) | b (L mg <sup>-1</sup> ) | R <sup>2</sup> |
| BSO                    | 3.552                                        | 0.355532   | 0.96599 | 0.90329        |                             | 0.016                   | -0.34226       |
| Eu <sub>1.5</sub> .BSO | 8.7                                          | 4.336814   | 0.3729  | 0.96814        | 9.5328                      | 1.3607                  | 0.98727        |

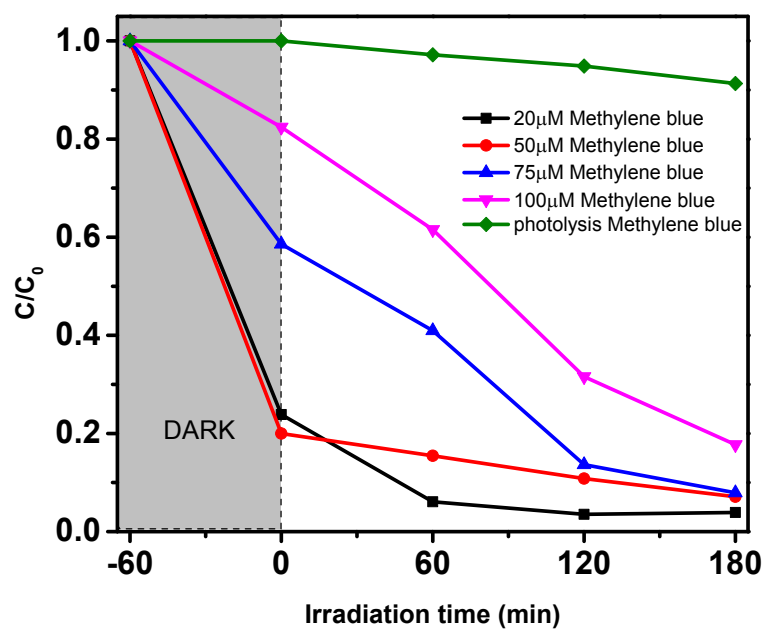

**Fig. S17:** Photocatalytic degradation of different amount of methylene blue dye by  $\text{Eu}_{1.5}$ -BSO nanoparticles under simulated solar light.

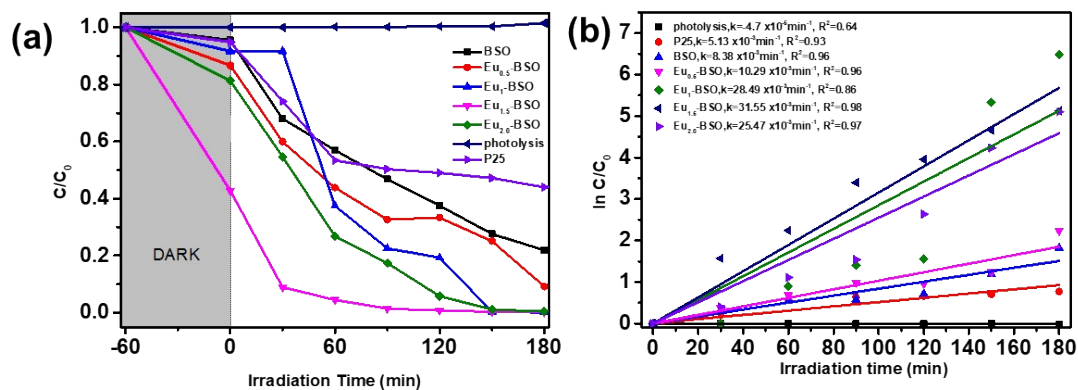

**Fig. S18:** (a) Photocatalytic degradation of rhodamine B dye ( $50\mu\text{M}$ ) in presence of BSO and  $Eu_{1.5}$ -BSO nanoparticles under simulated solar light. (b) Rate of photodegradation of rhodamine B dye calculated assuming first order kinetics.

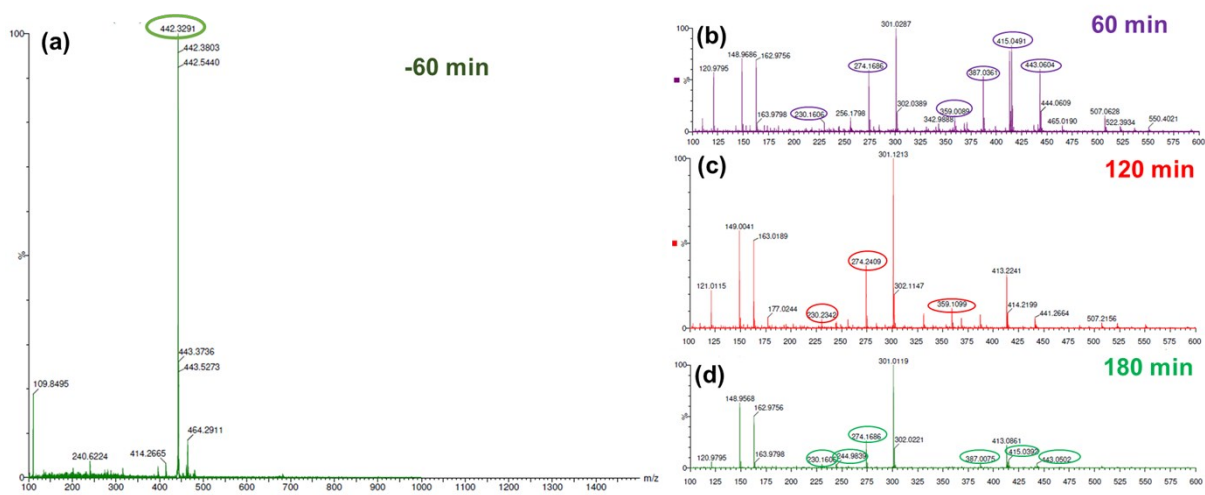

**Fig. S19:** ESI-MS spectra of aliquots of rhodamine B collected at different points of light illumination. (a) -60 min (represents dye without catalyst) (b) 60 min (c) 120 min (d) 180 min.



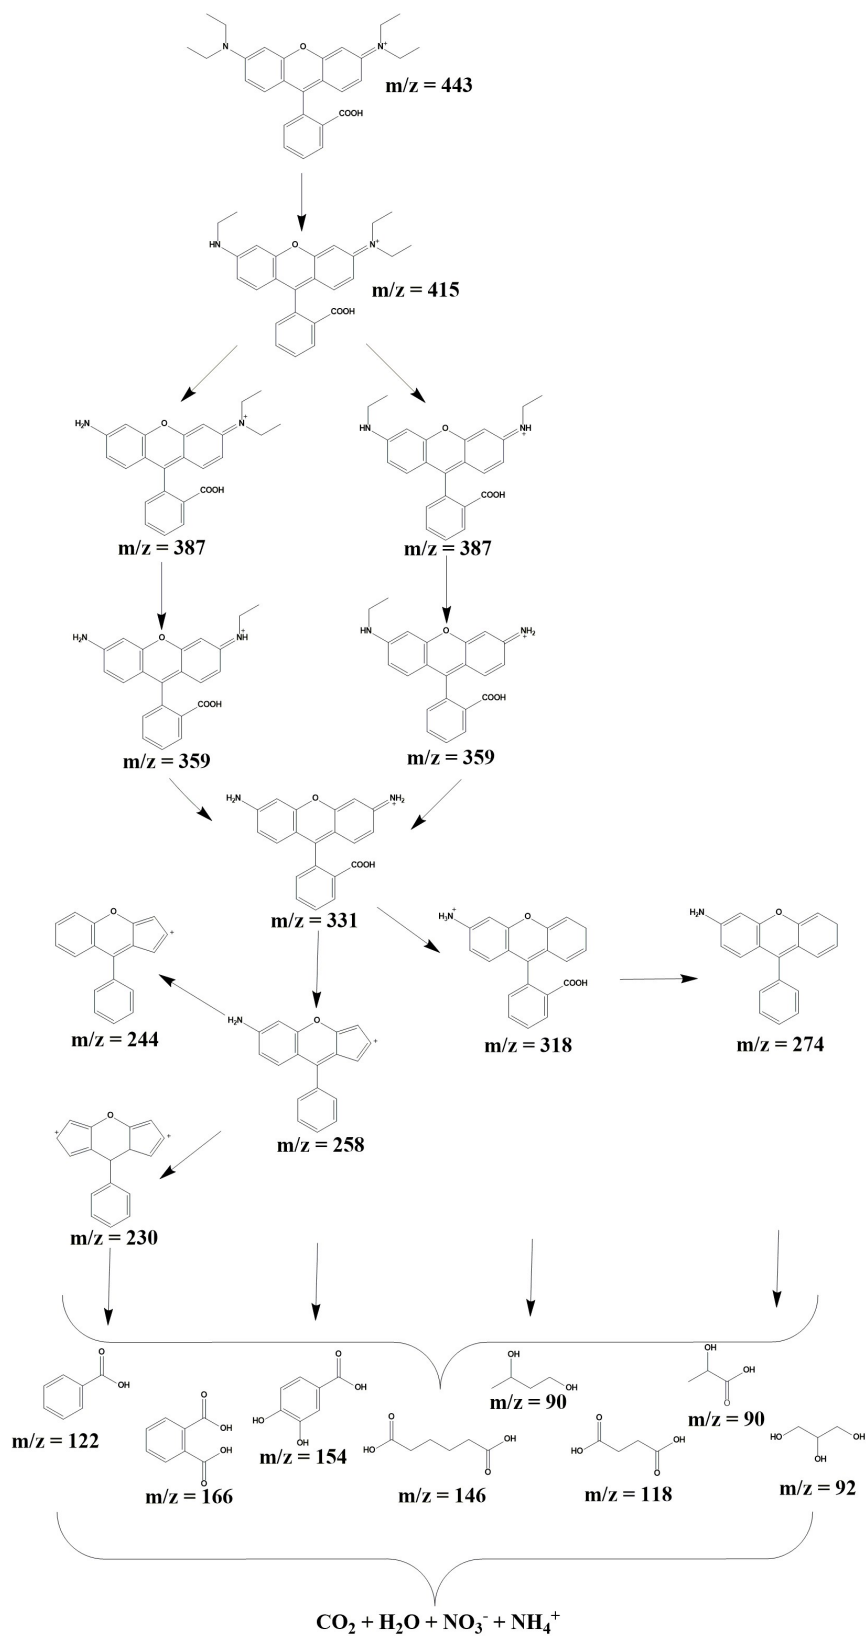

**Fig. S20:** Possible degradation pathway of rhodamine B

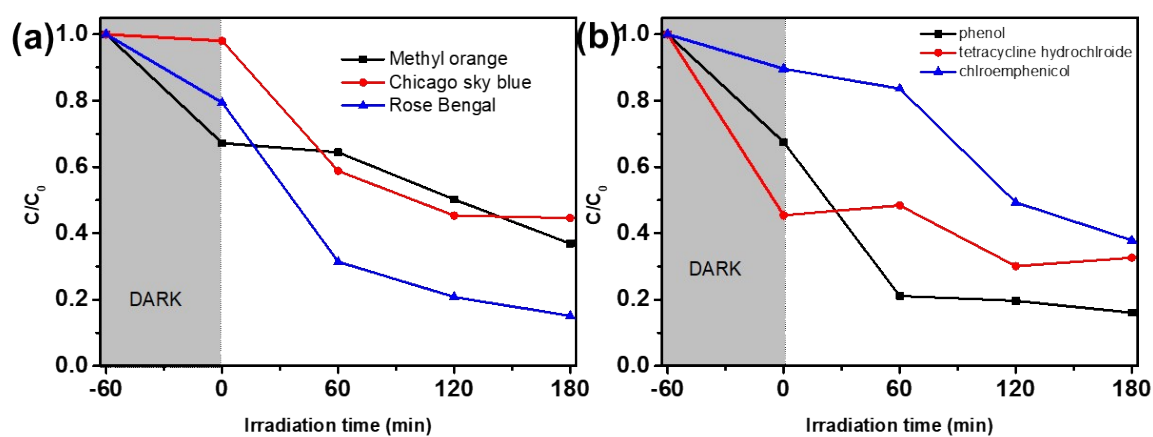

**Fig. S21:** (a) Photocatalytic degradation of various coloured dyes in presence  $\text{Eu}_{1.5}\text{-BSO}$  nanoparticles under simulated solar light. (b) Photocatalytic degradation of various colourless pollutants in presence  $\text{Eu}_{1.5}\text{-BSO}$  nanoparticles under simulated solar light.

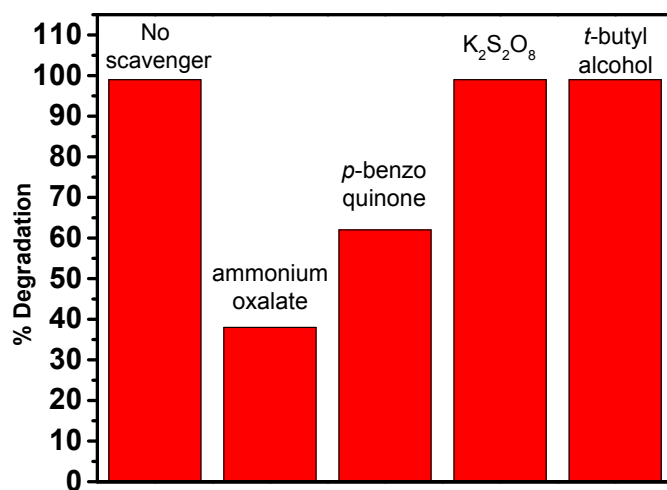

**Fig. S22:** Radical species trapping experiments for the photocatalytic degradation.

**Table S10:** Comparison of BET surface area and photocatalytic degradation using Bi<sub>2</sub>SiO<sub>5</sub> nanoparticles

| Material                                                                          | BET surface area (m <sup>2</sup> /g) | Morphology              | Pollutant          | Pollutant removal rate                   | Light Source                                      | Reference        |
|-----------------------------------------------------------------------------------|--------------------------------------|-------------------------|--------------------|------------------------------------------|---------------------------------------------------|------------------|
| Eu <sub>1.5</sub> -BSO                                                            | 70                                   | microflower             | rhodamine B        | 99% in 120 min                           | 140 W Xe (simulated solar light)<br>1.5 AM Filter | <b>This work</b> |
|                                                                                   |                                      |                         | methylene blue     | 98% in 180 min                           |                                                   |                  |
|                                                                                   |                                      |                         | phenol             | 85% in 180 min                           |                                                   |                  |
|                                                                                   |                                      |                         | methyl orange      | 62% in 180 min                           |                                                   |                  |
|                                                                                   |                                      |                         | Chicago sky blue   | 55% in 180 min                           |                                                   |                  |
|                                                                                   |                                      |                         | rose bengal        | 90% in 180 min                           |                                                   |                  |
|                                                                                   |                                      |                         | tetracycline       | 70% in 180 min                           |                                                   |                  |
| chlomphenicol                                                                     | 70% in 180 min                       |                         |                    |                                          |                                                   |                  |
| Bi <sub>2</sub> SiO <sub>5</sub>                                                  | 45                                   | microspheres            | phenol             | 94% in 80 min                            | 500 W Xe (simulated solar light)                  | 10               |
|                                                                                   |                                      |                         | rhodamine B        | 30 % in 30 min                           |                                                   |                  |
| Bi <sub>2</sub> SiO <sub>5</sub> /BiOBr                                           | 9                                    | nanosheets              | rhodamine B        | 99.5% in 60 min                          | 300 W Xe lamp                                     | 11               |
| Bi <sub>2</sub> SiO <sub>5</sub> /Bi <sub>12</sub> SiO <sub>20</sub>              | 33                                   | coralline               | acid orange 7      | 90% in 30 min                            | 100 W Hg lamp                                     | 12               |
|                                                                                   |                                      |                         | rhodamine B        | 90% in 30 min                            |                                                   |                  |
|                                                                                   |                                      |                         | p-chlorophenol     | 90% in 30 min                            |                                                   |                  |
|                                                                                   |                                      |                         | tetracycline       | 80% in 30 min                            |                                                   |                  |
| Bi <sub>2</sub> O <sub>3</sub> /Bi <sub>2</sub> SiO <sub>5</sub>                  | 66                                   | irregular               | Methylene blue,    | 0.25 h <sup>-1</sup>                     | 500 W Xe lamp                                     | 13               |
|                                                                                   |                                      |                         | 2,4-Dichlorophenol | 0.9 h <sup>-1</sup>                      |                                                   |                  |
|                                                                                   |                                      |                         | phenol             | 0.18 h <sup>-1</sup>                     |                                                   |                  |
| Bi <sub>2</sub> SiO <sub>5</sub> /BiPO <sub>4</sub>                               | 16                                   | plate-like              | Methylene blue     | 9.5 * 10 <sup>-3</sup> min <sup>-1</sup> | 500 W Xe lamp                                     | 14               |
|                                                                                   |                                      |                         | phenol             | 9.5 * 10 <sup>-3</sup> min <sup>-1</sup> |                                                   |                  |
| BiOBr/Bi <sub>2</sub> SiO <sub>5</sub>                                            | 13                                   | irregular nanosheets    | tetracycline       | 90% in 180 min                           | 300 W Xe lamp                                     | 15               |
| Bi <sub>2</sub> SiO <sub>5</sub> /Bi <sub>4</sub> Si <sub>3</sub> O <sub>12</sub> | 1                                    | Flower                  | Rhodamine          | 90% in 30 min                            | 300 W Xe Photocatalytic chamber                   | 16               |
| Bi <sub>2</sub> SiO <sub>5</sub>                                                  | 30                                   | flower-like microsphere | phenol             | 86 % in 5h                               | 500 W Xe Lamp (simulated solar light)             | 17               |
| Bi <sub>2</sub> SiO <sub>5</sub>                                                  | 4-6                                  | Nanosheets              | salicylic acid     | 99% in 120 min                           | 4W                                                | 18               |

|                                                                  |                   |             |                                                       |                |                                                |    |
|------------------------------------------------------------------|-------------------|-------------|-------------------------------------------------------|----------------|------------------------------------------------|----|
|                                                                  |                   |             |                                                       |                | UV lamp                                        |    |
| Bi <sub>2</sub> O <sub>3</sub> /Bi <sub>2</sub> SiO <sub>5</sub> | 8                 | Irregular   | bisphenol A                                           | 90% in 120 min | 500 W Xe<br>Lamp<br>(simulated<br>solar light) | 19 |
| Pt/Bi <sub>2</sub> SiO <sub>5</sub>                              | (not<br>provided) | Flower like | 7 $\alpha$ -<br>ethynylestradio<br>l(E <sub>2</sub> ) | 95.6% in 8 min | 20 W<br>Hg UV<br>lamp                          | 20 |

## References

- 1 C. X. Gui, Q. Q. Wang, S. M. Hao, J. Qu, P. P. Huang, C. Y. Cao, W. G. Song and Z. Z. Yu, *ACS Appl. Mater. Interfaces*, 2014, **6**, 14653–14659.
- 2 Y. Guo, J. Deng, J. Zhu, X. Zhou and R. Bai, *RSC Adv.*, 2016, **6**, 82523–82536.
- 3 F. Ferrero, *J. Environ. Sci.*, 2010, **22**, 467–473.
- 4 L. Liu, Y. Lin, Y. Liu, H. Zhu and Q. He, *J. Chem. Eng. Data*, 2013, **58**, 2248–2253.
- 5 Y. El Mouzdahir, A. Elmchaouri, R. Mahboub, A. Gil and S. A. Korili, *J. Chem. Eng. Data*, 2007, **52**, 1621–1625.
- 6 K. M. Parida, S. Sahu, K. H. Reddy and P. C. Sahoo, *J. Chem. Eng. Data* **2007**, **52**, 1621–1625.
- 7 H. P. C. V. Kuringen, G. M. Eikelboom, I. K. Shishmanova, D. J. Broer and A. P. H. J. Schenning, *Adv. Funct. Mater.*, 2014, **24**, 5045–5051.
- 8 L. Liu, Z. Y. Gao, X. P. Su, X. Chen, L. Jiang and J. M. Yao, *ACS Sustain. Chem. Eng.*, 2015, **3**, 432–442.
- 9 B. O. Okesola and D. K. Smith, *Chem. Commun.*, 1116, **49**, 11164.
- 10 L. Dou, J. Zhong, J. Li, J. Luo and Y. Zeng, *Mater. Res. Bull.*, 2019, **116**, 50–58.
- 11 B. Chai, J. Yan, G. Fan, G. Song and C. Wang, *J. Alloys Compd.*, 2019, **802**, 301–309.
- 12 W. Q. Li, Z. H. Wen, S. H. Tian, L. J. Shan and Y. Xiong, *Catal. Sci. Technol.*, 2018, **8**, 1051–1061.
- 13 H. Lu, Q. Hao, T. Chen, L. Zhang, D. Chen, C. Ma, W. Yao and Y. Zhu, *Appl. Catal. B Environ.*, 2018,

- 237**, 59–67.
- 14 D. Liu, W. Cai, Y. Wang and Y. Zhu, *Appl. Catal. B Environ.*, 2018, **236**, 205–211.
  - 15 J. Wang, G. Zhang, J. Li and K. Wang, *ACS Sustain. Chem. Eng.*, 2018, **6**, 14221–14229.
  - 16 K. Le Jia, J. Qu, S. M. Hao, F. An, Y. Q. Jing and Z. Z. Yu, *J. Colloid Interface Sci.*, 2017, **506**, 255–262.
  - 17 D. Liu, J. Wang, M. Zhang, Y. Liu and Y. Zhu, *Nanoscale*, 2014, **6**, 15222–15227.
  - 18 R. Chen, J. Bi, L. Wu, W. Wang, Z. Li and X. Fu, *Inorg. Chem.*, 2009, **48**, 9072–9076.
  - 19 L. Zhang, W. Wang, S. Sun, D. Jiang and E. Gao, *CrystEngComm*, 2013, **15**, 10043–10048.
  - 20 Y. Chen, S. Wang, J. Liu, Y. Zhang, Y. Long, L. Li, S. Zhang, L. Wang, and F. Jiang, *J. Photoch. Photobio. A*, 2018, **382**, 111920.
